# Supplementary material
Source: bioRxiv or medRxiv preprint supplement (http://www.biorxiv.org/highwire/filestream/2395/field_highwire_adjunct_files/4/009407-5.pdf)

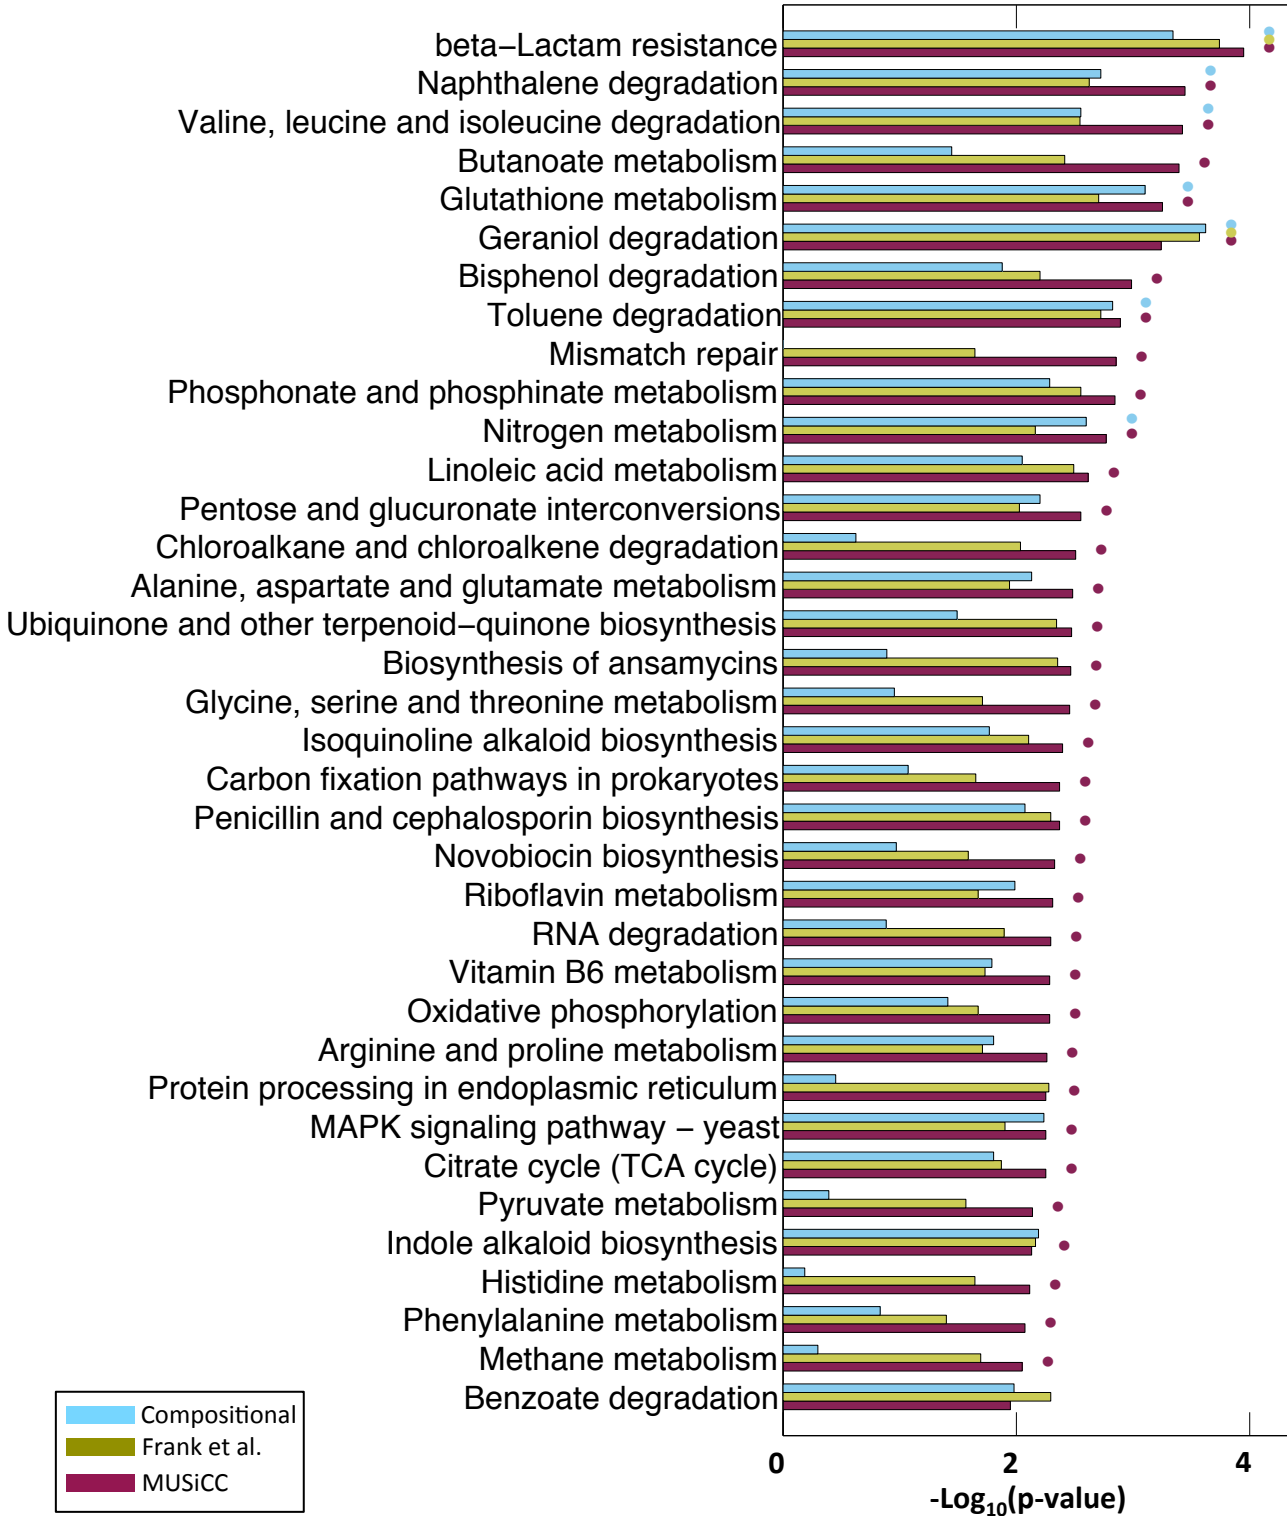

Supplement: Supplementary file [file 009407-5.pdf]
